# Supplementary material for: Molybdenum-independent [4Fe-4S]-Catalyzed Sulfate Assimilation Sustains Salmonella Virulence
Source: Research Square preprint supplement (doi:10.21203/rs.3.rs-7730877/v1), 2025-10-28
Supplement: Supplementary file 1 [file 1337d474238a582eb6ce4d17.pdf]

## **Molybdenum-independent [4Fe-4S]-Catalyzed Sulfate Assimilation Sustains *Salmonella* Virulence**

Ju-Sim Kim<sup>1</sup>, Siva Uppalapati<sup>1</sup>, Alyssa Margolis<sup>1</sup>, Michael McClelland<sup>2</sup>, Hanan Elajaili<sup>3</sup>, Eva Nozik<sup>3</sup>, Lin Liu<sup>1</sup>, and Andres Vazquez-Torres<sup>1,4\*</sup>

<sup>1</sup>University of Colorado School of Medicine, Department of Immunology and Microbiology,  
Aurora, Colorado-80045, USA

<sup>2</sup>University of California Irvine School of Medicine, Department of Microbiology and Molecular  
Genetics, Irvine, CA, USA

<sup>3</sup>Cardiovascular Pulmonary Research Laboratories and Pediatric Critical Care Medicine,  
University of Colorado Anschutz Medical Campus, Aurora, Colorado-80045, USA

<sup>4</sup>Veterans Affairs, Eastern Colorado Health Care System, Aurora, Colorado-80045, USA

Lead contact: Andres Vazquez-Torres  
Department of Immunology and Microbiology  
University of Colorado School of Medicine  
12800 East 19th Avenue MS 8333  
RC1 North room P18-9131  
Aurora, Colorado 80045, USA  
Email: [andres.vazquez-torres@cuanschutz.edu](mailto:andres.vazquez-torres@cuanschutz.edu)

## Supplementary Tables

**Table S1. Identity and similarity of DmsA (STM14\_1089) paralogs.**

|            | Identity | Similarity |
|------------|----------|------------|
| STM14_1809 | 66%      | 80%        |
| STM14_1811 | 68%      | 80%        |
| STM14_3103 | 40%      | 58%        |
| STM14_5178 | 49%      | 64%        |

  

|      |                                                                                                      |    |    |    |      |
|------|------------------------------------------------------------------------------------------------------|----|----|----|------|
|      | 20                                                                                                   | 40 | 60 | 80 | 100  |
| DmsA | -----MKTKPDAVLAAGVSRGLVKTATIGLAMASSAATILFFTR-IAAAEATSPAKTGEKVVSACTVNCGRSRLRMHVVDGEEKVETDNTGND        |    |    |    | : 94 |
| 1809 | -----MKITNPEALMAASLSRSILVKTSATIGSLALASSAATILFFSR-IAHAAADLASGNVAERAVWSCTVNCGRSRLRLHVKDDTVYVWESDTTCNDE |    |    |    | : 94 |
| 1811 | -----VPEGEKQGTGVSRRTLVKSAALGSLALAAGGVSLFEGMRTAAAVQQAMNNEEDKIVWGACSVNCGSRCLRLHVKNRNVWVVEDNTDTCV       |    |    |    | : 91 |
| 3103 | MGFYLTSTRINKNIKSGNGEQPATSRRHFCASSALIALPFVSSPATAQAARVTATENRPAEKVVQCCSFDCGCKCDIRAHVSGIVTRHSR-PINAL     |    |    |    | : 99 |
| 5178 | -----MEKKWLNITTITRDAIAAAKVAAVTLSCAIIILFFATTAQAQDTPIPKDANGCTVRHSAATLNCGRSRLPLKIVVNRDRVVRPEPADKDA      |    |    |    | : 93 |
|      | r 6v 6g 6pf a ek v c vICGS4C 64 hv 1 6 6e 1d                                                         |    |    |    |      |

  

|      |                                                                                                     |     |     |     |       |
|------|-----------------------------------------------------------------------------------------------------|-----|-----|-----|-------|
|      | 120                                                                                                 | 140 | 160 | 180 | 200   |
| DmsA | YDGLHGVRAACLRGRSRRRVVNPDRILYPMKRVGARGEGKFERISWDEAYDIIATNMQRILKPYGNESVIYNGTITLGGTITRSWPPGKTLVARLMNCC |     |     |     | : 194 |
| 1809 | GGVLSRSGSSTACTSAAMSVMFC-GNIGNSPDLIAATKLIVVMFGNNEATRMSGGGVYIYVEQARERSNARNIVIDPRYNDTAAGREDWLPTRPCTDG  |     |     |     | : 188 |
| 1811 | YG-NHGVRAACLRGRSRRRINHPDRILYPMKRVGARGEGKFERISWCEALDTISASLAKTVETVYGNBAVYIHSSIVSGNIRSSPAA-SPVKRLMNCY  |     |     |     | : 189 |
| 3103 | DAQMPVMRAACVRGAYRRHVYEPDRILYPMKRVGARGEGKFERISWDEATTLIDNLSSTERYGPASRVHVGTAVSGTFSGDKMAR-----LLNLT     |     |     |     | : 194 |
| 5178 | VFGHGIIRPCLGRSSRRVVSFDRILYPMKRVGARGEGKFERISWDEATAHIAETTRVSERYGREATIYNIQSAYYHTQGRPAWIR-----LLNLT     |     |     |     | : 187 |
|      | hq6kAc6GRs R r6 PDR6kYPMKRVG RGEgKFeRISWdEA I 6 YG e y y 3g gg rL6N                                 |     |     |     |       |

  

|      |                                                                                                     |     |     |     |       |
|------|-----------------------------------------------------------------------------------------------------|-----|-----|-----|-------|
|      | 220                                                                                                 | 240 | 260 | 280 | 300   |
| DmsA | GGYLNHVGDISSAQIAAGLNYTYGWAIDGNSPSLIENSKLVVLFQNNGETRMSGGGVYIYVEQARCKSNARNIIIDPRYIDTGAGREDWIPTRPCTDA  |     |     |     | : 294 |
| 1809 | GGVLSRSGSSTACTSAAMSVMFC-GNIGNSPDLIAATKLIVVMFGNNEATRMSGGGVYIYVEQARERSNARNIVIDPRYNDTAAGREDWLPTRPCTDG  |     |     |     | : 287 |
| 1811 | GGSTINQSGSSTACTSCAMMYTYG-SNIGNSTSLIENSKLVVLMFGNNEATRMSGGGVYIYVEQARCKSNARNIVIDPRYIDTAAGREDWIPTRPCTDA |     |     |     | : 288 |
| 3103 | ALNDAMMYVLIISNTIDRAETARYAIGFDEDSMEGVEGANESLVAYLIG-ARDGVKSPWEAKITHEVPAQTIRCLARDYANTKPAITICQGWGPQRNCG |     |     |     | : 291 |
| 5178 | GGYLNHNTYSTAQIATTEYVHC-DYVGSHTTCLARSLVVLFGNLSLETMRMSGGGVVEELRRRLSTSKARNIIIDPRYIDSVITEHAEWLPTRPCTDA  |     |     |     | : 286 |
|      | GGyL y yS aqi a Yt G G s 6 3kLV665G Np ETrmsggg t qa s aR I66DPRY D3 d2W6P6rP TD                    |     |     |     |       |

  

|      |                                                                                                       |     |     |     |       |
|------|-------------------------------------------------------------------------------------------------------|-----|-----|-----|-------|
|      | 320                                                                                                   | 340 | 360 | 380 | 400   |
| DmsA | ALVNGLIAYVLITENMVDQPLDKYVGVYDEHTLEASAPRNCHYKAYILICQEDGIAKTPPEWAACITCIPADRIIRKLAREIGSAKPAYICQGWGPQRHNG |     |     |     | : 394 |
| 1809 | ALAAAIWVLLITELIDKPELDKYIGYDEHTLEASAPRNCHYKAYILICQEDGIAKTPPEWAACITCIPADRIIRKLAREIGSAKPAYICQGWGPQRHNG   |     |     |     | : 387 |
| 1811 | ALVAGIAWVLLITENMVDQPLDKYIGYDEHTLEADAPPNGHAKAYILICQEDGIAKTPPEWAACITCIPADRIIRKLAREIGSAKPAYICQGWGPQRHNG  |     |     |     | : 388 |
| 3103 | ALNDAMMYVLIISNTIDRAETARYAIGFDEDSMEGVEGANESLVAYLIG-ARDGVKSPWEAKITHEVPAQTIRCLARDYANTKPAITICQGWGPQRNCG   |     |     |     | : 390 |
| 5178 | ALVAGIHTHTLITELIDALVNRVYVGVYRSTLEDDTAPNASTKYVYVGTEDGIAKTPPEWAACITCIPADRIIRKLAREIGSAKPAYICQGWGPQRHNG   |     |     |     | : 386 |
|      | AL 6a v6I E 6 D f6 Yc6G5De 3EP ap N ykaY61G g DG6aK3P2WA IT 6PA I LARei s 4pay6cQGWGPQRh ng           |     |     |     |       |

  

|      |                                                                                                    |     |     |     |       |
|------|----------------------------------------------------------------------------------------------------|-----|-----|-----|-------|
|      | 420                                                                                                | 440 | 460 | 480 | 500   |
| DmsA | BIAIRAISMTAHLTGNGVNGNSCAREGSYALPFFERMFL-BNPVETSSISEMWTDAITERGPBMTLRDGVRCRDKLVEIKMWNVAGNCLINCHSET   |     |     |     | : 493 |
| 1809 | BQIARAIAISVLTGNGVNGNSCVREGTWDLGVWFSL-BNPVKICISVETWTDAIDHGAEMTTRDGVRCRDKLVEIKFLWCYASNTLINCHGDI      |     |     |     | : 486 |
| 1811 | BQIARAIAIPHTGNGVNGNSCARESTYTITIERLFL-BNPVKIATSCSWTIALARGPBMTLRDGVRCRDKLVEIKFLWNNVAGNCLINCHSDI      |     |     |     | : 487 |
| 3103 | BRTARGSTLIATITGANGVKGCSWAAGYGGCANRKAAG-BPNDNPVKAKISVMNVQADDAASKVTPDMG-LKDADKLSNRITLFSIAGNYLQNCNPLI |     |     |     | : 489 |
| 5178 | BQIVRAIQTLPATITCFHFCFNNWNPYGTYPVPLLVG-RNPITISIPCLTWTATQHPEMVTITTMVEKADRIKTGIRKLRFNCAGNTLINCHGET    |     |     |     | : 485 |
|      | E t Rai L 6TGrvG1 Ggn g p NP6 t Is Wtdai 6Ta g64g D4Ld I4 5 AgN L Nqh                              |     |     |     |       |

  

|      |                                                                                                    |     |     |     |       |
|------|----------------------------------------------------------------------------------------------------|-----|-----|-----|-------|
|      | 520                                                                                                | 540 | 560 | 580 | 600   |
| DmsA | NRTHEILCDKKCEMVVVDCHMTSSAKYADILLFDCTASEQMFALDASCG-NMSYVIFTDQAIKFEFEKFTIYEMTSELAKRLG--VEGCFTEGRICE  |     |     |     | : 590 |
| 1809 | AHTEVLCDDSKCEMVVGEHEMTSSAKYCDILLFDLMTPEQDDIISHESAG-NMGYVILGCPATSEKFERKPIWWTLESAKRLGPDVYCTFTEGRICH  |     |     |     | : 585 |
| 1811 | NKTEHEILCDKCEMVVVDNEMTSSAKYADILLFDLMTVEQDDIIPNDYAG-NMGYLIFICPATTEKFERKPIWVWVLEIARRLGDDVYCTFTEGRICA |     |     |     | : 586 |
| 3103 | HQAVRVLEDSLCICFVVASLDLMTSSAKYADLLLPETSFNERNWGETWGTA---SYLLSEKLIBEFERRSDMDLREVAALGL--IENEFSQGRDEK   |     |     |     | : 584 |
| 5178 | NRTHEILADESLTETTVVLENMTSSAKYADLLLPETSYLEADIVDSSYAGSHNYMTAICKTVREEMWVRSYVDICALLAGHAG--LRQCYTEGRTCA  |     |     |     | : 583 |
|      | t 6L D kc2 I6 i MT SAKYad6LLP E 1 Y6I P 5E 4 Y e6A LG 6 532GrT2                                    |     |     |     |       |

  

|      |                                                                                                     |     |     |     |       |
|------|-----------------------------------------------------------------------------------------------------|-----|-----|-----|-------|
|      | 620                                                                                                 | 640 | 660 | 680 | 700   |
| DmsA | BWRHLYEQSRKSIENLTSEEFKQGIKORDPEG-HVYAKDFREDPOANPITPSGKIEIYSQALAHITATWELPEGDVIDELIYHFGFENYN-EP       |     |     |     | : 688 |
| 1809 | IRORYPLQLGFFYKARTSSSGNIDIIQQCCPQCIWINPIDACARGICQGITVRVENQNGEMLIIPAKVTIRILPGVTAICGGAWLNADMFGDKVVRGSS |     |     |     | : 683 |
| 1811 | KRSTFPLQLGFFYKRSSTSSSGNIDIVQACRCQEVWINPIDACARGANGDKVVENDRGELPAKVTRIRILPGVSAMCGGAWHNADMAGDRIHGAC     |     |     |     | : 684 |
| 3103 | AWIETHIEQIRLAMPDE-NLPDFATLQKTRCHLFKSAPRIAREDNIRDPENHFFITPSGKIEIYFSKRIYIMQH-----PPIPALSHYVBAHGGPE-IA |     |     |     | : 675 |
| 5178 | QWAEHMQQIREKRYLEBWSVAKEMVIDORATEQQSLABADFRADAEANPITPSGKIEIYSQALAHITATWELPEGDVIDELIYHFGFENYN-EP      |     |     |     | : 683 |
|      | w P p g 6A5 fr Dp anPl TPSGKIEISS La 6a tw l I Lp 5 p e d                                           |     |     |     |       |

  

|      |                                                                                                     |     |     |     |       |
|------|-----------------------------------------------------------------------------------------------------|-----|-----|-----|-------|
|      | 720                                                                                                 | 740 | 760 | 780 | 800   |
| DmsA | ITDRFPLQLGFFYKARVSTSGNVDIVKACRCQEMWINPMDACRGICNNGDKVRIENDRGEMHIEAKVTIRMMMPGVVALGEGAWYDEIAK--RVGCGG  |     |     |     | : 786 |
| 1809 | IRORYPLQLGFFYKARTSSSGNIDIIQQCCPQCIWINPIDACARGICQGITVRVENQNGEMLIIPAKVTIRILPGVTAICGGAWLNADMFGDKVVRGSS |     |     |     | : 783 |
| 1811 | KRSTFPLQLGFFYKRSSTSSSGNIDIVQACRCQEVWINPIDACARGANGDKVVENDRGELPAKVTRIRILPGVSAMCGGAWHNADMAGDRIHGAC     |     |     |     | : 784 |
| 3103 | IAKFFPLQLITWKGKFNASTGYANPWTIEVQQCTLWINQCDACRGRTDHGDMVVENSRGICETPEVETRIIPGVVAMQAGQWQDENG--VIRGGC     |     |     |     | : 773 |
| 5178 | ITARYPLQLGFFYKHTHTSTSNVLMHEVPDEVWINEIDASARCLKSGERFVVENDRGVNPLCKVTCRILPGVAMPAGAWTRILGNS--VIVGCG      |     |     |     | : 781 |
|      | l 5PLQL g5h K r hS3y n L a qe6WINP DAq Rg6 GD Vr6fN rG 6pakVTpR66PGV A6 GAW D g 6D Ggc              |     |     |     |       |

  

|      |                                   |
|------|-----------------------------------|
|      | 820                               |
| DmsA | INVLTTORPSFLAKGNPSTNLVQVEKA : 814 |
| 1809 | INVLTSRRPSFLAKGNPSSNLVQVEKA : 811 |
| 1811 | INVLTTREPSFLAKGNPSTNLVLEIKI : 812 |
| 3103 | ANVLSSARITLAKGNPSTNLVLEIAKA : 801 |
| 5178 | INVLTSRRPSFLAKGNPSTNLVLEIKI : 809 |
|      | iN L33 rp3pLAKGNp h3nLV26 4a      |

**Table S2. Bacterial strains used in this study.**

| Strain                   | Relevant characteristics                                                                                                                                           | Reference    |
|--------------------------|--------------------------------------------------------------------------------------------------------------------------------------------------------------------|--------------|
| <b><i>Salmonella</i></b> |                                                                                                                                                                    |              |
| 14028s                   | wild-type of <i>S. Typhimurium</i>                                                                                                                                 | ATCC         |
| AV20164                  | WT, pHluorin                                                                                                                                                       | <sup>1</sup> |
| AV24157                  | WT, pWSK29::STM_1811-1807 [WT pPSR3]                                                                                                                               | This study   |
| AV24051                  | WT, pWSK29::STM_3103-3101 [WT pPSR1]                                                                                                                               | This study   |
| AV24041                  | WT, pWSK29::STM_5178-5180 [WT pPSR2]                                                                                                                               | This study   |
| AV23012                  | WT, pWSK29::iscS [WT pISCS]                                                                                                                                        | <sup>1</sup> |
| AV13165                  | $\Delta$ cysJ::Cm [ $\Delta$ cysJ]                                                                                                                                 | lab stock    |
| AV22025                  | $\Delta$ dmsABC::Km [ $\Delta$ dmsABC]                                                                                                                             | <sup>1</sup> |
| AV0785                   | $\Delta$ iscS::Km [ $\Delta$ iscS]                                                                                                                                 | <sup>1</sup> |
| AV08158                  | $\Delta$ menA::FRT [ $\Delta$ menA]                                                                                                                                | lab stock    |
| AV21016                  | $\Delta$ moaABCDE::Km [ $\Delta$ moa]                                                                                                                              | <sup>1</sup> |
| AV22175                  | $\Delta$ mstA::Km [ $\Delta$ mstA]                                                                                                                                 | This study   |
| AV22195                  | $\Delta$ phsABC::Cm [ $\Delta$ phsABC]                                                                                                                             | lab stock    |
| AV24143                  | $\Delta$ pspE::Km [ $\Delta$ pspE]                                                                                                                                 | This study   |
| AV10074                  | $\Delta$ ubiC::Cm [ $\Delta$ ubiC]                                                                                                                                 | lab stock    |
| AV24048                  | $\Delta$ STM_1811::Cm [ $\Delta$ 1811]                                                                                                                             | This study   |
| AV24001                  | $\Delta$ STM_1811-1807::Cm [ $\Delta$ 1809 or $\Delta$ psr3]                                                                                                       | This study   |
| AV24055                  | $\Delta$ STM_1811-1807::Cm, pWSK29::iscS [ $\Delta$ psr3 pISCS]                                                                                                    | This study   |
| AV24035                  | $\Delta$ STM_1811-1807::Cm, pWSK29::STM_1811-1807 [ $\Delta$ 1809 p1809]                                                                                           | This study   |
| AV24158                  | $\Delta$ STM_1811-1807::Cm, pWSK29::STM_3103-3101 [ $\Delta$ 1809 p3103]                                                                                           | This study   |
| AV24159                  | $\Delta$ STM_1811-1807::Cm, pWSK29::STM_5178-5180 [ $\Delta$ 1809 p5178]                                                                                           | This study   |
| AV24002                  | $\Delta$ STM_3103-3101::Cm [ $\Delta$ 3103 or $\Delta$ psr1]                                                                                                       | This study   |
| AV24053                  | $\Delta$ STM_3103-3101::Cm, pWSK29::iscS [ $\Delta$ psr1 pISCS]                                                                                                    | This study   |
| AV24160                  | $\Delta$ STM_3103-3101::Cm, pWSK29::STM_1811-1807 [ $\Delta$ 3103 p1809]                                                                                           | This study   |
| AV24052                  | $\Delta$ STM_3103-3101::Cm, pWSK29::STM_3103-3101 [ $\Delta$ 3103 p3103]                                                                                           | This study   |
| AV24161                  | $\Delta$ STM_3103-3101::Cm, pWSK29::STM_5178-5180 [ $\Delta$ 3103 p5178]                                                                                           | This study   |
| AV24003                  | $\Delta$ STM_5178-5180::Cm [ $\Delta$ 5178 or $\Delta$ psr2]                                                                                                       | This study   |
| AV24042                  | $\Delta$ STM_5178-5180::Cm, pWSK29::iscS [ $\Delta$ psr2 pISCS]                                                                                                    | This study   |
| AV24162                  | $\Delta$ STM_5178-5180::Cm, pWSK29::STM_1811-1807 [ $\Delta$ 5178 p1809]                                                                                           | This study   |
| AV24163                  | $\Delta$ STM_5178-5180::Cm, pWSK29::STM_3103-3101 [ $\Delta$ 5178 p3103]                                                                                           | This study   |
| AV24003                  | $\Delta$ STM_5178-5180::Cm, pWSK29::STM_5178-5180 [ $\Delta$ 5178 p5178]                                                                                           | This study   |
| AV24069                  | $\Delta$ STM_3103-3101::Cm, $\Delta$ STM_5178-5180::FRT [1809+]                                                                                                    | This study   |
| AV24059                  | $\Delta$ STM_1811-1807::FRT, $\Delta$ STM_5178-5180::Cm [3103+]                                                                                                    | This study   |
| AV24068                  | $\Delta$ STM_1811-1807::FRT, $\Delta$ STM_3103-3101::Cm [5178+ or $\Delta$ psr2+]                                                                                  | This study   |
| AV24070                  | $\Delta$ STM_1811-1807::FRT, $\Delta$ STM_3103-3101::Cm, $\Delta$ STM_5178-5180::FRT [4 $\Delta$ ]                                                                 | This study   |
| AV24144                  | $\Delta$ STM_1811-1807::FRT, $\Delta$ STM_3103-3101::Cm, $\Delta$ STM_5178-5180::FRT, pHluorin                                                                     | This study   |
|                          | $\Delta$ STM_5178-5180::FRT, pWSK29::iscS [4 $\Delta$ pSCIS]                                                                                                       | This study   |
| AV24152                  | $\Delta$ STM_1811-1807::FRT, $\Delta$ STM_3103-3101::Cm, $\Delta$ STM_5178-5180::FRT, $\Delta$ dmsABC::Km [5 $\Delta$ ]                                            | This study   |
| AV24087                  | $\Delta$ STM_1811-1807::FRT, $\Delta$ STM_3103-3101::Cm, $\Delta$ STM_5178-5180::FRT, $\Delta$ moaABCDE::Km [4 $\Delta$ $\Delta$ moa]                              | This study   |
| AV24200                  | $\Delta$ STM_1811-1807::FRT, $\Delta$ STM_3103-3101::Cm, $\Delta$ STM_5178-5180::FRT, $\Delta$ dmsABC::Km, pWSK29::STM_1809-1807 [psr3+ or $\Delta$ psr3ABC+]      | This study   |
| AV25112                  | $\Delta$ STM_1811-1807::FRT, $\Delta$ STM_3103-3101::Cm, $\Delta$ STM_5178-5180::FRT, $\Delta$ dmsABC::Km, pWSK29::STM_1809-1807 $\Delta$ N66 [psr3 $\Delta$ N66+] | This study   |
| AV25113                  | $\Delta$ STM_1811-1807::FRT, $\Delta$ STM_3103-3101::Cm, $\Delta$ STM_5178-5180::FRT, $\Delta$ dmsABC::Km, pWSK29::STM_1809-1807 R105A [psr3 R105A+]               | This study   |
| AV24201                  | $\Delta$ STM_1811-1807::FRT, $\Delta$ STM_3103-3101::Cm, $\Delta$ STM_5178-5180::FRT, $\Delta$ dmsABC::Km,                                                         |              |

|         |                                                                                                                                                        |            |
|---------|--------------------------------------------------------------------------------------------------------------------------------------------------------|------------|
| AV25021 | pWSK29::STM_1809-1807 S199G [psr3 S199G+]<br>ΔSTM_1811-1807::FRT, ΔSTM_3103-3101::Cm,<br>ΔSTM_5178-5180::FRT, ΔmoaABCDE::Km                            | This study |
| AV24196 | pWSK29:: pWSK29::STM_1809-1807 [psr3+ Δmoa]<br>ΔSTM_1811-1807::FRT, ΔSTM_3103-3101::Cm,<br>ΔSTM_5178-5180::FRT, ΔdmsABC::Km,<br>pWSK29::dmsABC [dmsA+] | This study |
| AV25117 | ΔSTM_1811-1807::FRT, ΔSTM_3103-3101::Cm,<br>ΔSTM_5178-5180::FRT, ΔdmsABC::Km,<br>pWSK29::dmsABC ΔN66 [dmsA ΔN66+]                                      | This study |
| AV25118 | ΔSTM_1811-1807::FRT, ΔSTM_3103-3101::Cm,<br>ΔSTM_5178-5180::FRT, ΔdmsABC::Km,<br>pWSK29::dmsABC R106A [dmsA R106A+]                                    | This study |
| AV24197 | ΔSTM_1811-1807::FRT, ΔSTM_3103-3101::Cm,<br>ΔSTM_5178-5180::FRT, ΔdmsABC::Km,<br>pWSK29::dmsABC S205G [dmsA S205G+]                                    | This study |
| AV25020 | ΔSTM_1811-1807::FRT, ΔSTM_3103-3101::Cm,<br>ΔSTM_5178-5180::FRT, ΔmoaABCDE::Km<br>pWSK29::dmsABC [dmsA+ Δmoa]                                          | This study |
| AV25046 | ΔSTM_1811-1807::FRT, ΔSTM_3103-3101::Cm,<br>ΔSTM_5178-5180::FRT, ΔdmsABC::Km,<br>pWSK29::STM_3103~3101 [psr1+ ]                                        | This study |
| AV25047 | ΔSTM_1811-1807::FRT, ΔSTM_3103-3101::Cm,<br>ΔSTM_5178-5180::FRT, ΔdmsABC::Km,<br>pWSK29::STM_3103~3101 S205G [psr1 S205G+]                             | This study |
| AV25048 | ΔSTM_1811-1807::FRT, ΔSTM_3103-3101::Cm,<br>ΔSTM_5178-5180::FRT, ΔdmsABC::Km,<br>pWSK29::STM_5178~5180 [psr2+]                                         | This study |
| AV25049 | ΔSTM_1811-1807::FRT, ΔSTM_3103-3101::Cm,<br>ΔSTM_5178-5180::FRT, ΔdmsABC::Km,<br>pWSK29::STM_5178~5180 S198G [psr2 S198G+]                             | This study |
| AV25065 | ΔSTM_1811-1807::FRT, ΔSTM_3103-3101::Cm,<br>ΔSTM_5178-5180::FRT, ΔdmsABC::Km,<br>pWSK29::STM_1809 & 1808 [psr3AB+]                                     | This study |
| AV25091 | ΔSTM_1811-1807::FRT, ΔSTM_3103-3101::Cm,<br>ΔSTM_5178-5180::FRT, ΔdmsABC::Km,<br>pWSK29::STM_1809 [psr3A+]                                             | This study |
| AV25073 | ΔSTM_1811-1807::FRT, ΔSTM_3103-3101::Cm,<br>ΔSTM_5178-5180::FRT, ΔdmsABC::Km,<br>pWSK29::p1809::STM_1808 [psr3B+]                                      | This study |
| AV25074 | ΔSTM_1811-1807::FRT, ΔSTM_3103-3101::Cm,<br>ΔSTM_5178-5180::FRT, ΔdmsABC::Km,<br>pWSK29::p1809::STM_1808 & 1807 [psr3BC+]                              | This study |
| AV25066 | ΔSTM_1811-1807::FRT, ΔSTM_3103-3101::Cm,<br>ΔSTM_5178-5180::FRT, ΔdmsABC::Km,<br>pWSK29::p1809::STM_1807 [psr3C+]                                      | This study |

## ***E.coli***

|         |                                                                          |            |
|---------|--------------------------------------------------------------------------|------------|
| DH5α    | supE44 ΔlacU169 (φ80 lacZ ΔM15) hsdR17 recA1<br>endA1 gyrA96 thi-1 relA1 | 2          |
| AV21115 | DH5α (pWSK29-dmsABC)                                                     | 1          |
| AV25102 | DH5α (pWSK29-dmsABC ΔN66)                                                | This study |
| AV25106 | DH5α (pWSK29-dmsABC R106A)                                               | This study |
| AV24193 | DH5α (pWSK29-dmsABC S205G)                                               | This study |
| AV23019 | DH5α (pWSK29-iscS) [pISCS]                                               | 1          |
| AV24044 | DH5α (pWSK29::STM_1811-1807)                                             | This study |
| AV24076 | DH5α (pWSK29::STM_1809-1807)                                             | This study |
| AV25101 | DH5α (pWSK29::STM_1809-1807 ΔN66)                                        | This study |
| AV25105 | DH5α (pWSK29::STM_1809-1807 R105A)                                       | This study |

|         |                                       |            |
|---------|---------------------------------------|------------|
| AV24166 | DH5α (pWSK29::STM_1809-1807 S199G)    | This study |
| AV25063 | DH5α (pWSK29::STM_1809 & 1808)        | This study |
| AV25075 | DH5α (pWSK29::STM_1809)               | This study |
| AV25080 | DH5α (pWSK29::p1809::STM_1808)        | This study |
| AV25079 | DH5α (pWSK29::p1809::STM_1808 & 1807) | This study |
| AV25064 | DH5α (pWSK29::p1809::STM_1807)        | This study |
| AV24046 | DH5α (pWSK29::STM_3103-3101)          | This study |
| AV25032 | DH5α (pWSK29::STM_3103-3101 S205G)    | This study |
| AV24040 | DH5α (pWSK29::STM_5178-5180)          | This study |
| AV25057 | DH5α (pWSK29::STM_5178-5180 S198G)    | This study |

**Table S3. Plasmids used in this study.**

| Plasmid          | Relevant characteristics                                                                                                       | Reference  |
|------------------|--------------------------------------------------------------------------------------------------------------------------------|------------|
| pWSK29           | low copy plasmid, <i>lacZα</i> , Pn <sup>r</sup>                                                                               | 3          |
| pKD13            | template vector for FRT-flanked Km <sup>r</sup> cassette, Km <sup>r</sup> Pn <sup>r</sup>                                      | 4          |
| pKD3             | template vector for FRT-flanked Cm <sup>r</sup> cassette, Cm <sup>r</sup> Pn <sup>r</sup>                                      | 4          |
| pHluorin         | pH-sensitive green fluorescent proteins inpGEMEX-2, Pn <sup>r</sup>                                                            | 5          |
| pISCS            | pWSK29 + 1.60-kb DNA containing <i>piscS::iscS</i> , Pn <sup>r</sup>                                                           | 1          |
| pDMS             | pWSK29 + 4.22-kb DNA containing <i>pdmsA::dmsABC</i> , Pn <sup>r</sup>                                                         | 1          |
| pDMS ΔN66        | pWSK29 + 4.22-kb DNA containing <i>pdmsA::dmsABC</i> , <i>dmsA</i> N66 deletion, Pn <sup>r</sup>                               | This study |
| pDMS R106A       | pWSK29 + 4.22-kb DNA containing <i>pdmsA::dmsABC</i> , <i>dmsA</i> R106A mutation, Pn <sup>r</sup>                             | This study |
| pDMS S205G       | pWSK29 + 4.22-kb DNA containing <i>pdmsA::dmsABC</i> , <i>dmsA</i> S205G mutation, Pn <sup>r</sup>                             | This study |
| p1811~1807       | pWSK29 + 6.8-kb DNA containing <i>p1811::1811</i> and <i>p1809::1809,1808, and1807</i> , Pn <sup>r</sup>                       | This study |
| p1809~1807       | pWSK29 + 4.2-kb DNA containing <i>p1809::1809,1808, and1807</i> , Pn <sup>r</sup>                                              | This study |
| p1809~1807 ΔN66  | pWSK29 + 4.2-kb DNA containing <i>p1809::1809,1808, and1807</i> , <i>1809</i> N66 deletion, Pn <sup>r</sup>                    | This study |
| p1809~1807 R105A | pWSK29 + 4.2-kb DNA containing <i>p1809::1809,1808, and1807</i> , <i>1809</i> R105A mutation, Pn <sup>r</sup>                  | This study |
| p1809~1807 S199G | pWSK29 + 4.2-kb DNA containing <i>p1809::1809,1808, and1807</i> , <i>1809</i> S199G mutation, Pn <sup>r</sup>                  | This study |
| p1809 & 1808     | pWSK29 + 3.3-kb DNA containing <i>p1809::1809 and 1808</i> , Pn <sup>r</sup>                                                   | This study |
| p1809            | pWSK29 + 2.7-kb DNA containing <i>p1809::1809</i> , Pn <sup>r</sup>                                                            | This study |
| p1808            | pWSK29 + 0.21-kb <i>p1809</i> DNA + 0.62-kb <i>1808</i> gene containing <i>p1809::1808</i> , Pn <sup>r</sup>                   | This study |
| p1808 & 1807     | pWSK29 + 0.21-kb <i>p1809</i> DNA + 1.5-kb <i>1808&amp;1807</i> genes containing <i>p1809::1808 and 1807</i> , Pn <sup>r</sup> | This study |
| p1807            | pWSK29 + 0.21-kb <i>p1809</i> DNA + 0.88-kb <i>1807</i> gene containing                                                        | This study |
| p3103~3101       | pWSK29 + 4.1-kb DNA containing <i>p3103::3103,3102, and 3101</i> , Pn <sup>r</sup>                                             | This study |
| p3103~3101 S205G | pWSK29 + 4.1-kb DNA containing <i>p3103::3103,3102, and 3101</i> , <i>3103</i> S205G mutation, Pn <sup>r</sup>                 | This study |
| p5178~5180       | pWSK29 + 4.1-kb DNA containing <i>p5178::5178,5179, and 5180</i> , Pn <sup>r</sup>                                             | This study |
| p5178~5180 S198G | pWSK29 + 4.1-kb DNA containing <i>p5178::5178,5179, and 5180</i> , <i>5178</i> S198G mutation, Pn <sup>r</sup>                 | This study |

**Table S4. Oligonucleotides used in this study.**

| <b>Strains</b>                         | <b>Primer Sequence (5' → 3')</b>                                                                                                                                                                       |
|----------------------------------------|--------------------------------------------------------------------------------------------------------------------------------------------------------------------------------------------------------|
| $\Delta dmsABC::Km$                    | <b>F:</b> GCATTTACCCTGCCATTTACCCGCATCGCTAACGCCGCAGTGTAGGC<br>TGGAGCTGCTTCG<br><b>R:</b> CGCCAGCATCAGAATGAAGGCGACAGAGAGCAACGGTACCGATTCCG<br>GG GATCCGTCGAC                                              |
| $\Delta moaABCDE::Km$                  | <b>F:</b> TACTTGCGTTTGTCTGATTACCGATGTGTGTAACCTTCGTGTGTAGGCTG<br>GAGCTGCTTCG<br><b>R:</b> AACGGCGCACGGGTTTTTCAGATAATCCATAATGAACTGACCATTCCGG<br>GGATCCGTCGAC                                             |
| $\Delta mstA::Km$                      | <b>F:</b> GACGCCCGTATGGCGCCGCCAGGACAGGAACATCGTGATGTGTAGG<br>CTGGAGCTGCTTCG<br><b>R:</b> TCCAGCGTGGCGAGCGCCAGCACACGACCGCGGCCGTCACATTCC<br>GGGGATCCGTCGAC                                                |
| $\Delta pspE::Km$                      | <b>F:</b> GGAATATTTGCGTTAGCGTTATTCATAGCCATGCCGCTTGTGTAGGCT<br>GGAGCTGCTTCG<br><b>R:</b> TTTTTTTACTTTTCGGCATATCAAGACGACTGATACCGCCCAATTCCGG<br>GGATCCGTCGAC                                              |
| $\Delta 1809::Cm$<br>[ $\Delta psr3$ ] | <b>F:</b> GGAGAAAAGCAACAAACAGGCGTTAGCCGCAGGACGTTAGTGTAGGC<br>TGGAGCTGCTTCG<br><b>R:</b> ACCTGCGACGGCCATACCTACGGTCATATGCAGGCCATAACATATGAA<br>TATCCTCCTTAG                                               |
| $\Delta 3103::Cm$<br>[ $\Delta psr1$ ] | <b>F:</b> CGGATCATGAAAAATATAAAAAGCCAGGGAAATGGCGAAGTGTAGGC<br>TGGAGCTGCTTCG<br><b>R:</b> AGCCAATACTAAAGAAGACGTAGCGCAGCATAATCTCGCCCATATGA<br>ATATCCTCCTTAG                                               |
| $\Delta 5178::Cm$ [ $\Delta psr2$ ]    | <b>F:</b> AAATGGCTGAACACAACCATAACCCGACGTGATGCTATTGTGTAGGC<br>TGGAGCTGCTTCG<br><b>R:</b> TTGGCAGCGTCCACAGATTGTAAAACGCAATCCTACCCGCCATATGA<br>ATATCCTCCTTAG                                               |
| $\Delta 1811::Cm$                      | <b>F:</b> GGAGAAAAGCAACAAACAGGCGTTAGCCGCAGGACGTTAGTGTAGGC<br>TGGAGCTGCTTCG<br><b>R:</b> TGACTTTGGCGGGTAGACGCACCTCTCCACGATCGTTAAACATATGAA<br>TATCCTCCTTAG                                               |
| <b>Plasmids</b>                        |                                                                                                                                                                                                        |
| p1811~1807                             | <b>F:</b> ATCGAAGCTTGCGCGAACGACACGCAT<br><b>R:</b> ATCGCTCGAGTGCGGGTCGCCCCGCACG                                                                                                                        |
| p1809~1807                             | <b>F:</b> ATCGAAGCTTGACCACGGCGCCTGCAT<br><b>R:</b> ATCGCTCGAGTGCGGGTCGCCCCGCACG                                                                                                                        |
| p1809~1808                             | <b>F:</b> ATCGAAGCTTGACCACGGCGCCTGCAT<br><b>R:</b> ATCGCTCGAGCATGCCATCCACTTCCCA                                                                                                                        |
| p1809                                  | <b>F:</b> ATCGAAGCTTGACCACGGCGCCTGCAT<br><b>R:</b> ATCGCTCGAGCCATACTGGGTTGTCATC                                                                                                                        |
| p1808                                  | Promoter 1809 part<br><b>F:</b> ATCGAAGCTTGACCACGGCGCCTGCAT<br><b>R:</b> CACTTCCCATAACAGCTCACTATGCTC<br>1808 part<br><b>F:</b> TAGTGAGCTGTTATGGGAAGTGGATGGCA<br><b>R:</b> ATCGCTCGAGTGCGGGTCGCCCCGCACG |
| p1808 & 1807                           | Promoter 1809 part<br><b>F:</b> ATCGAAGCTTGACCACGGCGCCTGCAT<br><b>R:</b> CACTTCCCATAACAGCTCACTATGCTC<br>1808 & 1807 part                                                                               |

|            |                                                                                                                                                                            |
|------------|----------------------------------------------------------------------------------------------------------------------------------------------------------------------------|
|            | F: GTGAGCTGTTATGACAACCCAGTATGGA<br>R: ATCGCTCGAGTGCGGGTCGCCCCGCACG                                                                                                         |
| p1807      | Promoter 1809 part<br>F: ATCGAAGCTTGACCACGGCGCCTGCAT<br>R: CACTTCCCATAACAGCTCACTATGCTC<br>1807 part<br>F: TAGTGAGCTGTTATGGGAAGTGGATGGCA<br>R: ATCGCTCGAGTGCGGGTCGCCCCGCACG |
| p3103~3101 | F: ATCGAAGCTTAAATGGCGAACCTGTTAATGGC<br>R: ATCGCTCGAGCCGGATCGATCGTCAGGTT                                                                                                    |
| p5178~5180 | F: ATCGAAGCTTGCCTTGCAAGGGCGCGCT<br>R: ATCGCTCGAGCATAAACCGGGCAAAAA                                                                                                          |

### Real-time qRT-PCR

|             |                                                                                                        |
|-------------|--------------------------------------------------------------------------------------------------------|
| <i>cysJ</i> | F: TTCGCAAACCGGCAATGCGC<br>R: TCGCCGAGGCTAAACACGGC<br>Probe: 6-FAM- ATTCAAACAGATTGCCAGTGA-3BHQ-1       |
| <i>cysK</i> | F: TATTGCGCTGGCGTATGTCTG<br>R: CCGGAGATAAACACATCCACC<br>Probe: 6-FAM- TTCAGAAAGCCGAAGAAATTGT-3BHQ-1    |
| <i>cysM</i> | F: CGGTGAAAGATCGCGCGGCGC<br>R: CAGACATAGCGAGCGCTAAATC<br>Probe: 6-FAM- AAGGTTATCGCATGAAGCTGTTGA-3BHQ-1 |
| <i>iscS</i> | F: TTGCCGAGAAAATGATGCAGTT<br>R: TGTGCTTGCCTTTTTTCTGAT<br>Probe: 6-FAM-TTGGGAACCCGGCGTCTCGT-3BHQ-1      |
| <i>mstA</i> | F: CGAATATCGCGCCGGACATATTC<br>R: CATTCTGTCGCGCTGCCAGCC<br>Probe: 6-FAM- AAACACCTGGTCATATACGATGA-3BHQ-1 |
| <i>phsA</i> | F: ACGCGCTATCTGGTTTCGTTT<br>R: AACGCGGATCGAAGCTCAC<br>Probe: 6-FAM- CCTGCGCGGTCATTAACCTCATGGG-3BHQ-1   |
| <i>pspE</i> | F: CGTTAGCGTTATTCATAGCC<br>R: ACCGCCCATATTCATCGCGTG<br>Probe: 6-FAM- ATATTCAGGGCGCGATTAATA-3BHQ-1      |
| <i>rpoD</i> | F: GTGGCTTGCAATTCCTTGAT<br>R: AGCATCTGGCGAGAAATA<br>Probe: 6-FAM-ATAAGTTCGAATACCGTCGCG-3BHQ-1          |
| STM_1811    | F: TTCGAGCGCAAGCCCATC<br>R: ATGCCGGATCTCTTGCCT<br>Probe: 6-FAM- ATTGCGCCTGTGTACGGCCTT-3BHQ-1           |
| STM_3103    | F: GCACGGCAAGCTACCTGA<br>R: GCTTTCTCATCGCGCCCCTG<br>Probe: 6-FAM- ATGCCTAATTTGCGCCGCCACC-3BHQ-1        |
| STM_5178    | F: TGCCATTGTTGCCTGTCG<br>R: CTTTCACACCCATTGTCGT<br>Probe: 6-FAM-CTGAATGGCGTCCGTCCACA-3BHQ-1            |

### Site-directed point mutations

|                   |                                                                                                |
|-------------------|------------------------------------------------------------------------------------------------|
| <i>dmsA</i> ΔN66  | F: TGGAGCGCCTGTACGGTA*TGTGGCAGCCGTTGTCCG<br>R: CGGACAACGGCTGCCACA*TACCGTACAGGCGCTCCA           |
| <i>dmsA</i> R106A | F: GTTCGCGCCTGCCTG <b>G</b> CCGGTCGTTCTATGCGC<br>R: GCGCATAGAACGACC <b>G</b> GCCAGGCAGGCGCGAAC |

|                   |                                                                                                                      |
|-------------------|----------------------------------------------------------------------------------------------------------------------|
| <i>dmsA</i> S205G | F: TACGGTGATTAC <b><i>GGT</i></b> TCCGCGCAAATCGCA<br>R: TGCGATTTGCGCGGA <b><i>ACCGTA</i></b> ATCACCGTA               |
| 1809 ΔN66         | F: TGGAGTTCATGTACCGTT* <b><i>TG</i></b> CGGCAGCCGCTGCCTG<br>R: CAGGCAGCGGCTGCCGCA* <b><i>AACGGT</i></b> ACATGAACTCCA |
| 1809 R105A        | F: CAGGTACGCGCCTGCCTG <b><i>GCCG</i></b> GCCGTTCTATTTCGT<br>R: ACGAATAGAACGGCC <b><i>GGCC</i></b> CAGGCAGGCGCGTACCTG |
| 1809 S199G        | F: TACGGTAGCTAC <b><i>GGC</i></b> ACCGCCCAAATC<br>R: GATTTGGGCGGT <b><i>GCCG</i></b> TAGCTACCGTA                     |
| 3103 S205G        | F: TACCATTCTGTG <b><i>GGC</i></b> ATGGGCAACACGGCG<br>R: CGCCGTGTTGCCCAT <b><i>GCCC</i></b> ACAGAATGGTA               |
| 5178 S198G        | F: CACAACACCTAT <b><i>GGC</i></b> ACGGCGCAAATCGCC<br>R: GGCGATTTGCGCCGT <b><i>GCC</i></b> ATAGGTGTTGTG               |

\* Restriction enzyme sites are underlined.

\*\* Point mutation sites are indicated in bold and italic.

\*\*\* Deleted sites are marked with an asterisk.



**a**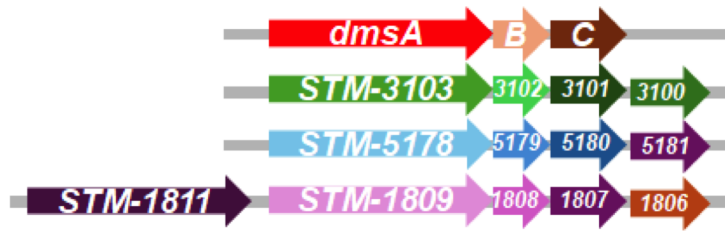**b**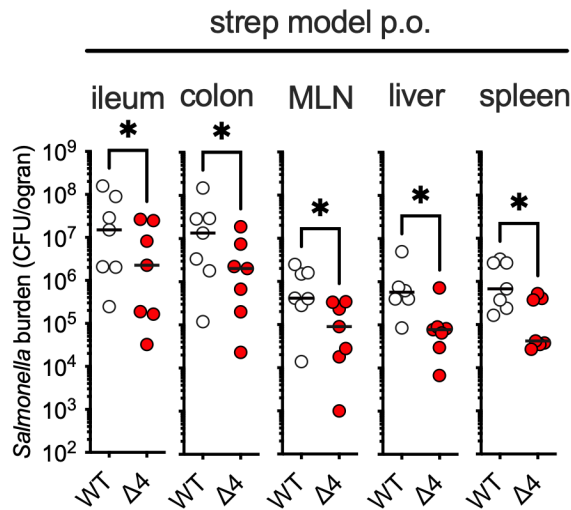**c**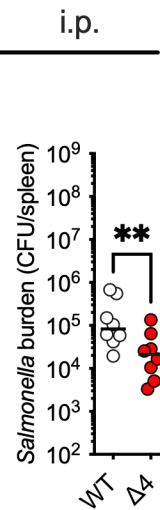

**Figure S1. Operon organization of DmsA paralogs and their contribution to *Salmonella* fitness.** **a.** Scheme of *dmsA* paralog operons. **b.** Competition of  $\Delta 4$  (quadruple mutant in all four *dmsA* paralogs) and wild-type *Salmonella* in the ileum, colon, MLN, liver and spleen of C57BL/6 mice in a streptomycin-treated model of oral infection. The bacterial burden was assessed by calculating the CFUs 4 days post-infection after p.o. inoculation. The data are mean  $\pm$  SD from 7 mice in 2 independent experiments. **c.** Virulence of  $\Delta 4$  *Salmonella* was assessed by counting bacterial burden in the spleens of C57BL/6 3 days after i.p. inoculation of  $\sim 500$  CFU mixture of equal numbers of wild-type and mutant *Salmonella*. The data are presented as mean  $\pm$  SD from 8 mice in 2 individual experiments. \*, \*\*,  $p < 0.1, 0.01$ , respectively, as estimated by paired *t*-test (**b, c**).

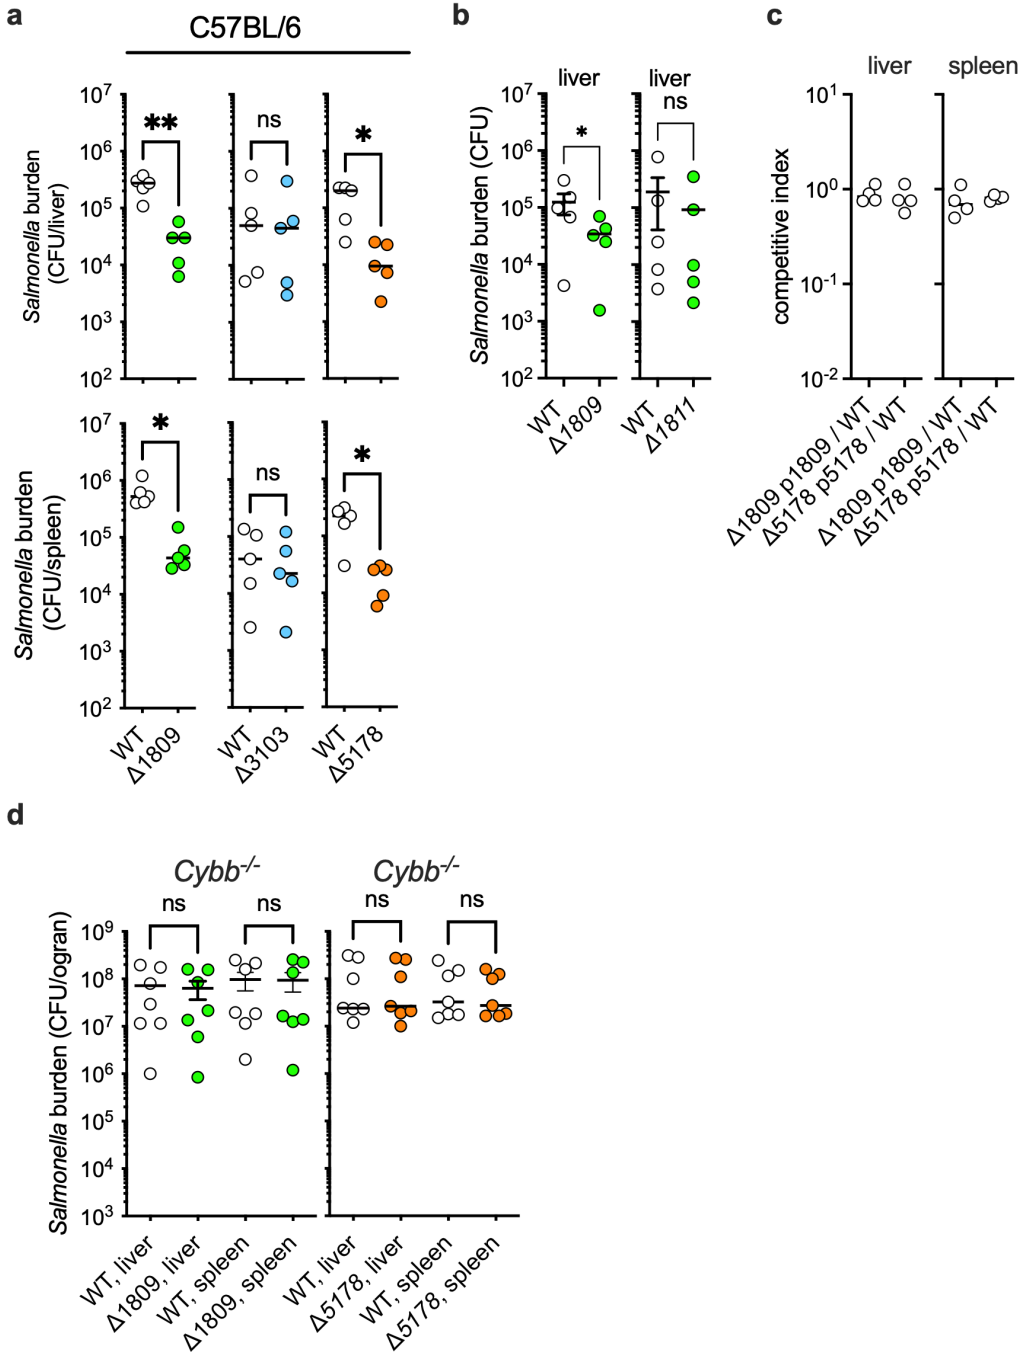

**Figure S2. DmsA paralogs enhance *Salmonella* resistance to phagocyte NADPH oxidase-driven oxidative stress.** **a, b, c, d.** The bacterial burden was quantified in the spleens and livers of C57BL/6 mice 3 days after i.p. inoculation with ~300 CFU of a mixture containing equal numbers of wild-type *Salmonella* and isogenic mutants (**a, b, d**). Competitive index (**c**) was calculated 3 days after i.p. infection. Data represent mean  $\pm$  SD from 2 independent experiments (**a** liver and spleen  $n=5$  mice; **b**  $n=4$  mice; **c**  $n=5$  mice; **d** liver and spleen  $n=7$  mice). \*, \*\*,  $p < 0.1$ , 0.01 as estimated by paired  $t$ -test (**a, b, c**) or one-way ANOVA (**d**).

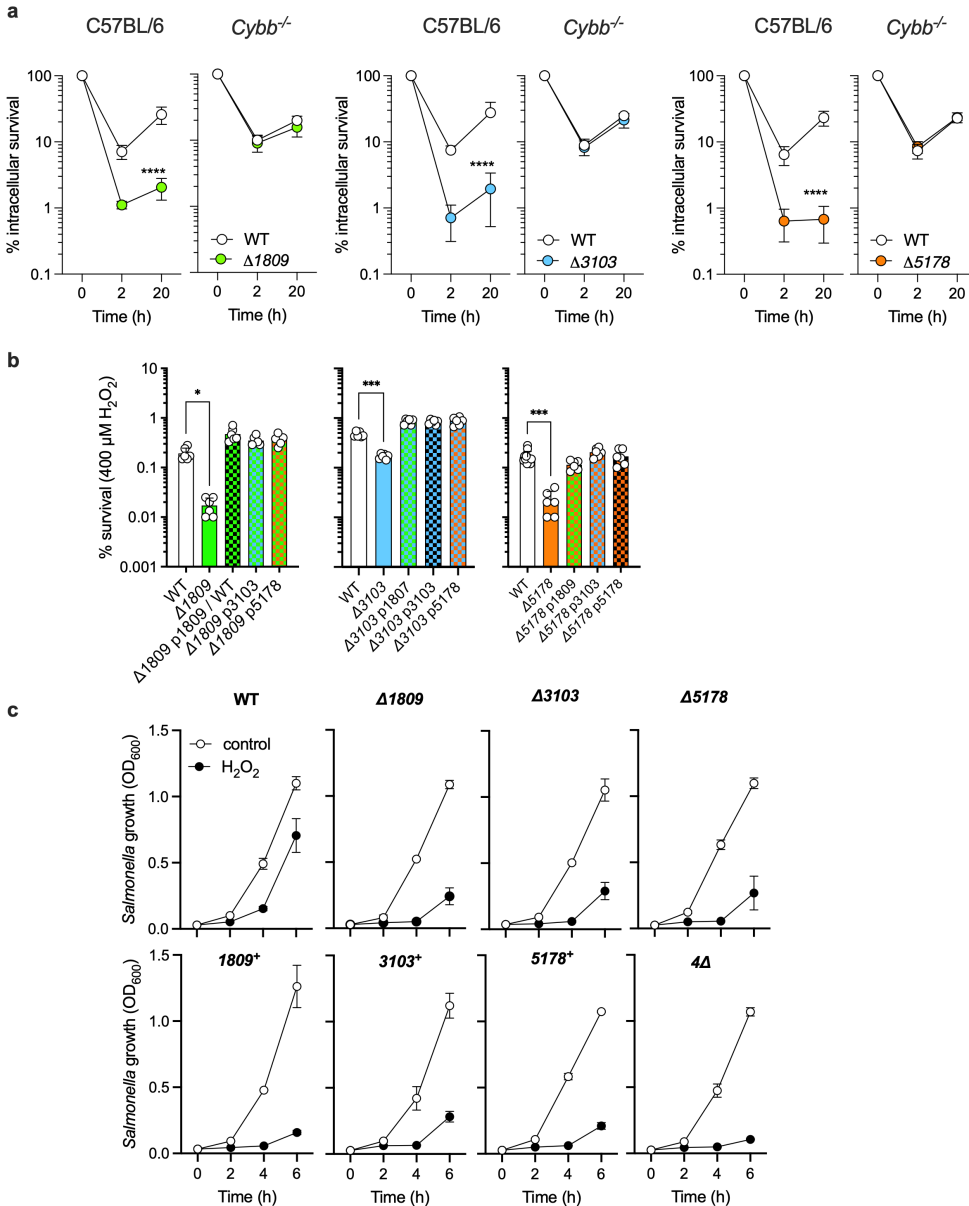

**Figure S3. Susceptibility of *dmsA* paralog mutants to oxidative stress.** **a.** The percent survival of single *dmsA* paralog deletion mutants was assessed in periodate-elicited macrophages from C57BL/6 and *Cybb*<sup>-/-</sup> mice. CFU were enumerated at 0, 2, and 20 h post-infection to determine bacterial replication. The data are mean  $\pm$  SD from 2 independent experiments (C57BL/6, n=7; *Cybb*<sup>-/-</sup>, n=10). **b.** Single *dmsA* paralog deletion mutants were cultured aerobically in LB broth at 37°C and challenged with 400  $\mu$ M H<sub>2</sub>O<sub>2</sub> in PBS for 2 h. Bacterial survival was determined by CFU enumeration. Cross-complementation was performed using the *dmsA* paralog cloned into the low-copy plasmid pWSK29. The data are mean  $\pm$  SD; n=6 (right panel WT n=12) from 3-4 individual experiments. \*, \*\*\*, \*\*\*\*  $p < 0.1$ , 0.001, 0.0001, respectively, were calculated by two-way (a) or one-way ANOVA (b). **c.** Growth, as measured by OD<sub>600</sub>, of *dmsA* paralog mutants in MOPS-GLC-sulfate minimal medium supplemented with 400  $\mu$ M H<sub>2</sub>O<sub>2</sub>. The strains carried single (e.g.,  $\Delta 1809$ ) or quadruple (i.e.,  $\Delta 4$ ) mutations in *dmsA* paralogs. Strains expressing single *dmsA* paralogs (e.g., 1809<sup>+</sup>) were constructed by complementing the  $\Delta 4$  strain

with the pWSK29 plasmid bearing *psr1*, *psr2*, or *psr3* operons. Data are represented as mean  $\pm$  SD from 2 biological replicates in 2 independent experiments.

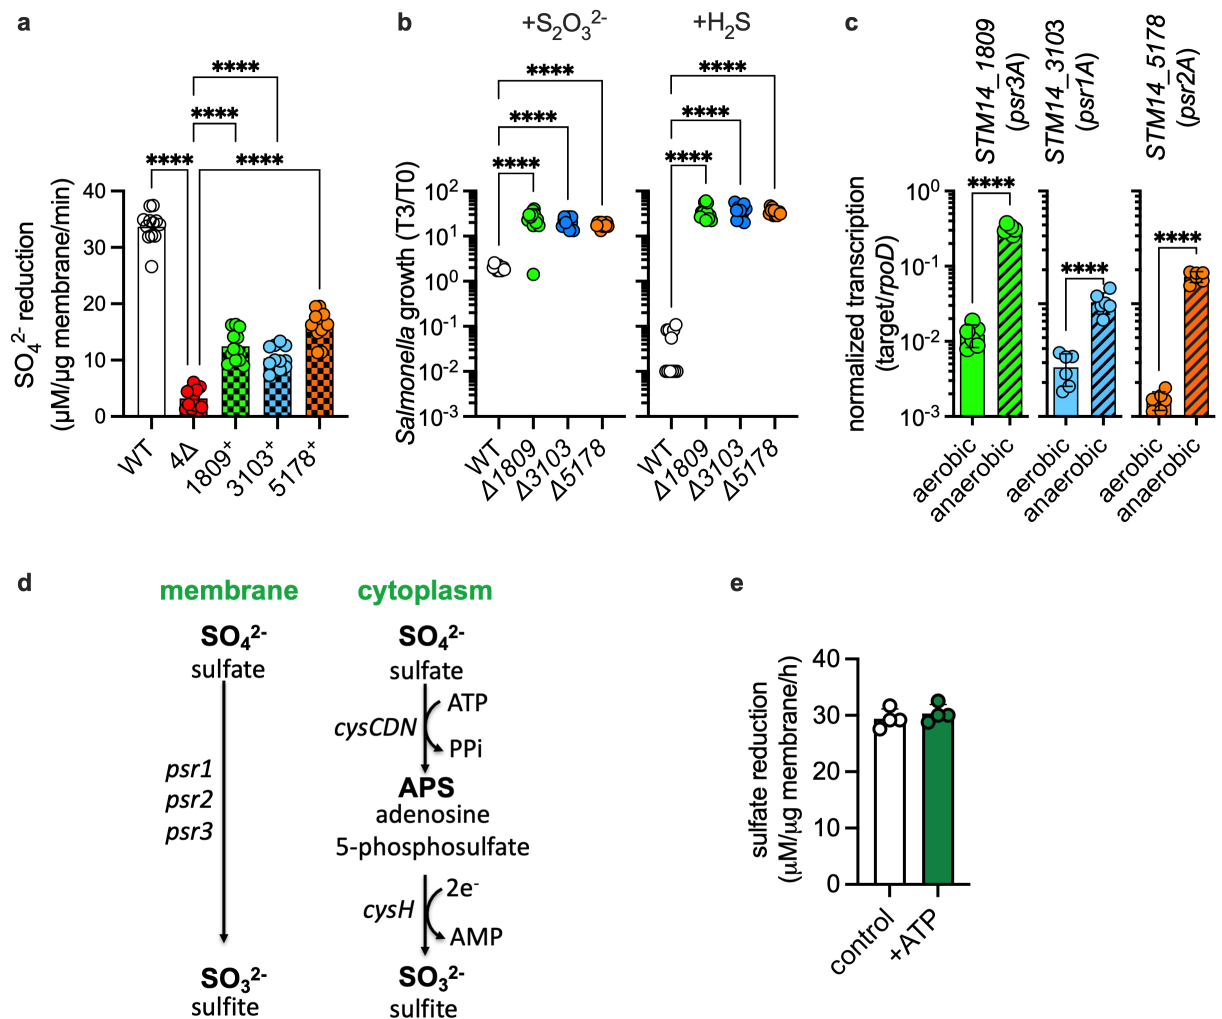

**Figure S4. DmsA paralogs function as membrane-associated sulfate reductases, indirectly facilitating sulfur acquisition to support the growth of *Salmonella*.** **a.** Sulfate reductase activities were measured in membranes isolated from the indicated strains. The strains carried quadruple (i.e., Δ4) mutations in *dmsA* paralogs. Strains expressing single *dmsA* paralogs (e.g., 1809<sup>+</sup>) were constructed by complementing the Δ4 strain with the pWSK29 plasmid bearing specific operons. Sulfate reductase activity was monitored by following the oxidation of benzyl viologen. The data are mean  $\pm$  SD; n=12 from 4 independent experiments. **b.** Growth rescue of *dmsA* paralog mutants by exogenous sulfur compounds. Growth defects observed in single *dmsA* paralog deletion mutants were rescued by supplementation with 100 μM sodium thiosulfate (Na<sub>2</sub>S<sub>2</sub>O<sub>3</sub>), or sodium sulfide (Na<sub>2</sub>S). Mutants were cultured in MOPS-GLC-minimal medium containing thiosulfate or sulfide for 3 h at 37°C under hypoxic conditions. Bacterial viability was assessed by CFU enumeration. The data are mean  $\pm$  SD; n=12 from 3 independent experiments. **c.** Transcripts of *dmsA* paralog genes were quantified by real-time qRT-PCR using RNA isolated from *Salmonella* cultured aerobically or anaerobically in MOPS-GLC-minimal medium supplemented with 250 μM sulfate. The data are mean  $\pm$  SD; n=6 from 2 independent experiments. **d.** Pathway of sulfate reduction in the cell membrane and cytoplasm of *Salmonella*. **e.** Evaluation of ATP-dependent sulfate reduction. Sulfate utilization was measured in isolated

membrane fractions of *Salmonella* in the presence of 0.2 mM ATP. Data represent mean  $\pm$  SD; n=4 from 2 individual experiments. \*\*\*\*  $p < 0.0001$  as estimated by one-way ANOVA (**a**, **b**) or unpaired  $t$  test (**c**).

**Figure S5. See attached Excel file.**

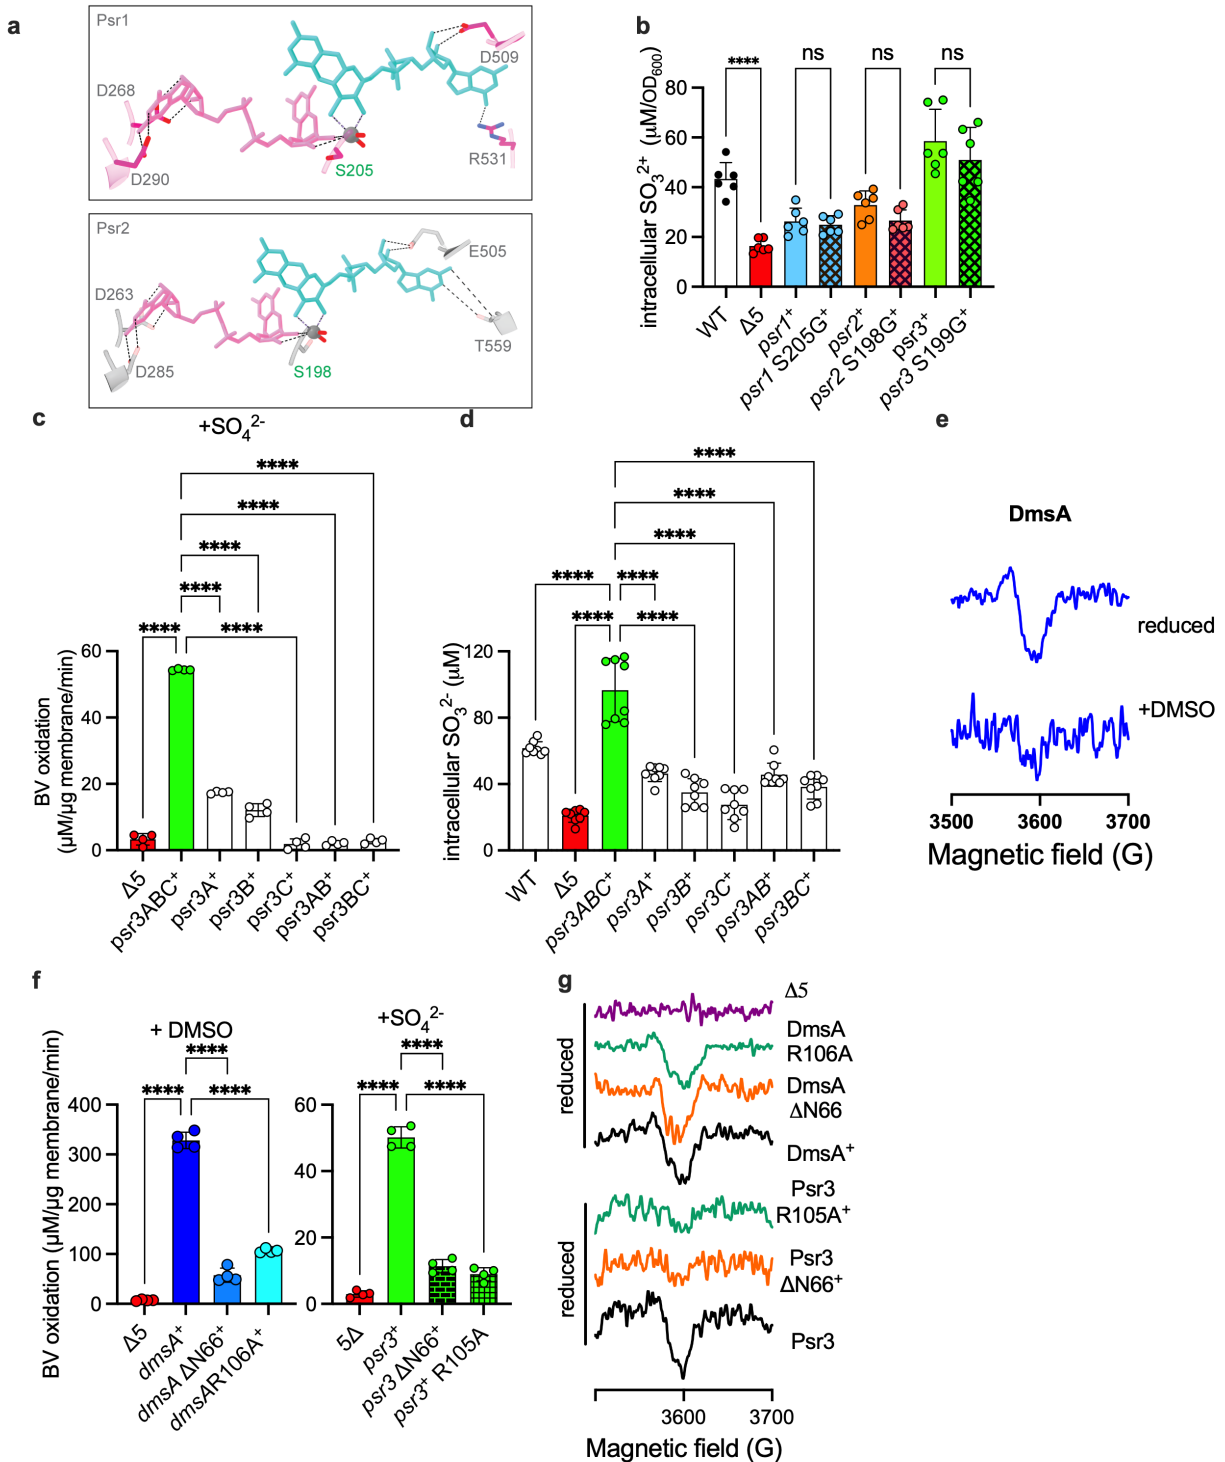

**Figure S6. The function of periplasmic sulfate reductase in *Salmonella* is dependent on the FS0 [4Fe-4S], but not molybdenum, cofactor.** **a.** The predicted Mo-bis PGD in Psr1A and Psr2A as determined by AlphaFold<sub>3</sub>. **b, d.** Intracellular sulfite concentrations were measured in wild-type *Salmonella*, the  $\Delta 5$  mutant deficient in *dmsA* and all 4 *dmsA* paralogs, and various complemented strains after overnight growth under hypoxic conditions in MOPS-GLC minimal medium supplemented with sulfate. The data are presented as mean  $\pm$  SD from 2 individual tests (**b**,  $n=6$ ; **d**,  $n=8$ ). **c.** Sulfate reductase activities were assessed by monitoring benzyl viologen oxidation in

membranes isolated from the  $\Delta 5$  mutant and its complemented strains expressing individual genes, gene pairs, or the entire *psr3ABC* operon. Data presents mean  $\pm$  SD from 2 independent experiments (n=4). **e.** EPR spectra of membranes isolated from *Salmonella* were recorded after reduction with 2 mM dithionite, either alone (reduced) or in the presence of 50 mM DMSO (**e**, +DMSO). **f.** The membranes used for EPR spectroscopy were evaluated for DMSO and sulfate reductase activities by measuring the oxidation of benzyl viologen in the presence of DMSO (left, +DMSO) or sulfate (right, +SO<sub>4</sub><sup>2-</sup>). The data are presented as mean  $\pm$  SD from 2 independent experiments (n=4). \*\*, \*\*\*, \*\*\*\*  $p < 0.01, 0.001, 0.0001$ , respectively, as estimated by one-way ANOVA (**b, c, d, f**).

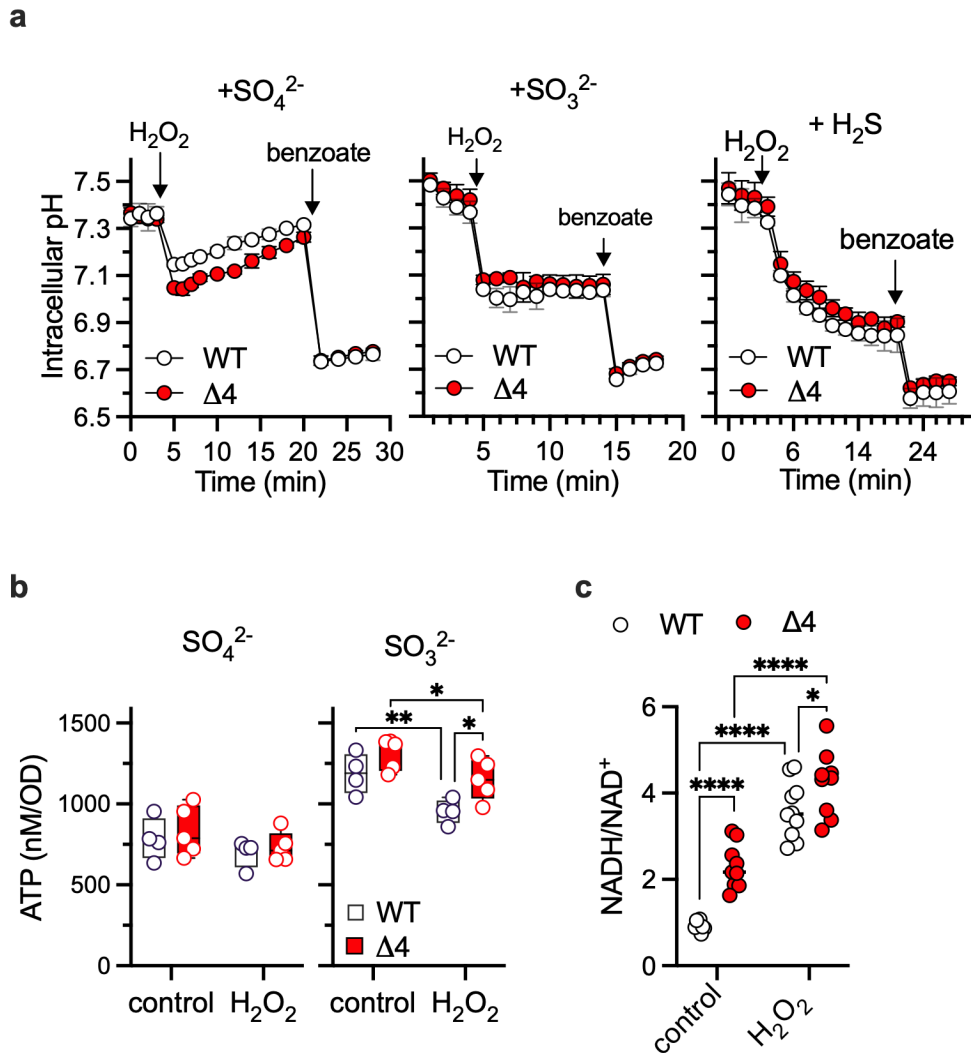

**Figure S7. Effect of periplasmic sulfate reductases in the sulfate assimilatory pathway. a.** Intracellular pH of exponential-phase *Salmonella* cultured in MOPS-GLC minimal medium either 250  $\mu$ M sulfate, 250  $\mu$ M sulfite, or 100  $\mu$ M sulfide was measured using ratiometric pH-sensitive reporter pHluorin. Where indicated, the specimens were treated with 400  $\mu$ M  $H_2O_2$  or 40 mM of the protonophore benzoate. The data are mean  $\pm$  SD;  $n=3$  from 3 independent experiments. **b.** Intracellular ATP levels were measured using a luciferase-based assay from *Salmonella* grown in MOPS-GLC minimal medium supplemented with either sulfate or sulfite. Data represent the mean  $\pm$  SD from 2 individual experiments (WT  $n=4$ ,  $\Delta 4$   $n=5$ ). **c.** Intracellular NADH / NAD<sup>+</sup> ratios were quantified in *Salmonella* grown aerobically in MOPS-GLC minimal medium supplemented with sulfate. The data are the mean  $\pm$  SD from 2 individual experiments (WT control  $n=8$ ; WT  $H_2O_2$   $n=10$ ;  $\Delta 4$   $n=9$ ). \*, \*\*, \*\*\*\*  $p < 0.1$ , 0.01, 0.0001, respectively, as estimated by one-way ANOVA (b, c).



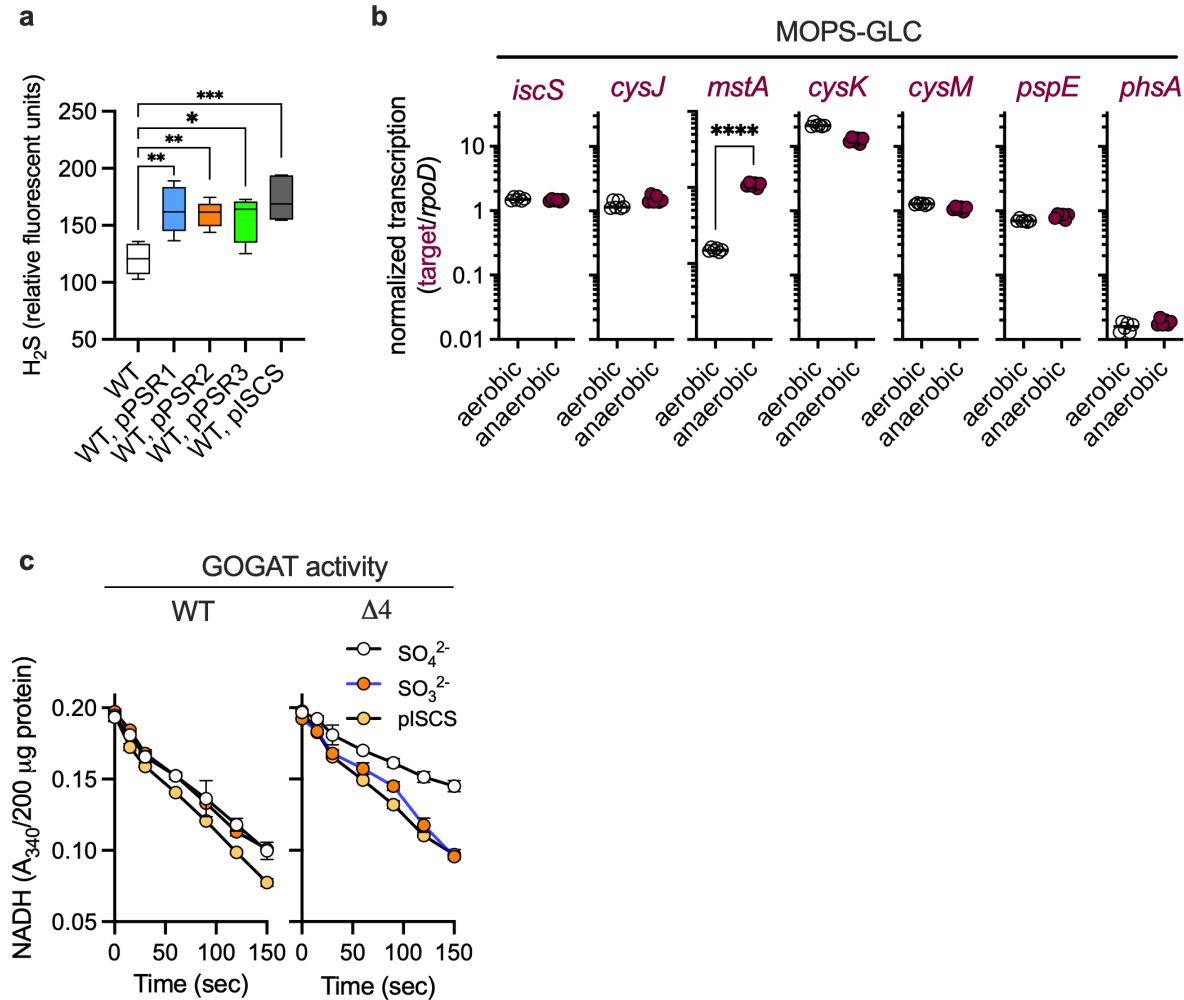

**Figure S8. Periplasmic sulfate reductases are involved in the assimilation of sulfur.** **a**, Hydrogen sulfide (H<sub>2</sub>S) production was evaluated in wild-type *Salmonella* harboring each individual periplasmic sulfate reductase operon (*psr1*, *psr2* and *psr3*) or the *iscS* gene in pWSK29. Cells were cultured in MOPS-GLC minimal medium containing sulfate. H<sub>2</sub>S was detected using the WSP5 fluorescent probe. The data are the mean  $\pm$  SD from 2-3 independent experiments (WT, n=6; pPSR3, n=4). **b**, Expression of indicated genes was quantified by real-time qRT-PCR using RNA isolated from wild-type *Salmonella* cultured aerobically or anaerobically in MOPS-GLC-minimal medium supplemented with sulfate. The data are mean  $\pm$  SD; n=6 from 2 individual experiments. \*, \*\*, \*\*\*, \*\*\*\*  $p < 0.1$ , 0.01, 0.001, 0.0001, respectively, as estimated by one-way ANOVA (**a**), or unpaired *t*-test (**b**). **c**, Glutamate synthase (GOGAT) activity was assessed kinetically by measuring the oxidation of NADH. Specimens were prepared from *Salmonella* grown in MOPS-GLC minimal medium containing either sulfate or sulfite. Selected strains harbored the *iscS* gene from the pWSK29 plasmid. The data are mean  $\pm$  SD; n=3 from 2 independent experiments.

## References

1. Kim, J.-S. *et al.* Anaerobic respiration of host-derived methionine sulfoxide protects intracellular *Salmonella* from the phagocyte NADPH oxidase. *Cell Host Microbe* **32**, 411-424.e10 (2024).
2. Chakraborty, S. *et al.* Glycolytic reprogramming in *Salmonella* counters NOX2-mediated dissipation of  $\Delta$ pH. *Nat. Commun.* **11**, 1783 (2020).
3. Hanahan, D. Studies on transformation of *Escherichia coli* with plasmids. *J. Mol. Biol.* **166**, 557–580 (1983).
4. Rong Fu Wang & Kushner, S. R. Construction of versatile low-copy-number vectors for cloning, sequencing and gene expression in *Escherichia coli*. *Gene* **100**, 195–199 (1991).
5. Datsenko, K. A. & Wanner, B. L. One-step inactivation of chromosomal genes in *Escherichia coli* K-12 using PCR products. *Proc. Natl. Acad. Sci.* **97**, 6640–6645 (2000).
6. Miesenböck, G., De Angelis, D. A. & Rothman, J. E. Visualizing secretion and synaptic transmission with pH-sensitive green fluorescent proteins. *Nature* **394**, 192–195 (1998).
