# Supplementary material for: Molybdenum-independent [4Fe-4S]-Catalyzed Sulfate Assimilation Sustains Salmonella Virulence
Source: Research Square preprint supplement (doi:10.21203/rs.3.rs-7730877/v1), 2025-10-28
Supplement: Supplementary file 1 [file 370318f0d106242215a475d0.xlsx]

## Sheet: McClelland
	Salmonella enterica subsp. enterica serovar Typhimurium str. 14028S GenBank Accession CP001363
	gene_ID_BV-BRC	STM_14#	LT2 gene	paralog	periplasmic sulfate reductase	annotated function in GenBnak	ref_genome_start	ref_genome_end	ref_genome_strand
	fig|588858.6.peg.1094	1089	STM0964	dms1A		Anaerobic dimethyl sulfoxide reductase chain A (EC 1.8.5.3), molybdopterin-binding domain	1003680	1006124	+		0.92907										0.788131									0.911174					0.90744				0.91816
	fig|588858.6.peg.1095	1090	STM0965	dms1B		Anaerobic dimethyl sulfoxide reductase chain B (EC 1.8.5.3), iron-sulfur binding subunit	1006135	1006752	+			0.966145					0.922365					0.92734									0.90744									0.97112				0.96117
	fig|588858.6.peg.1096	1091	STM0966	dms1C		Anaerobic dimethyl sulfoxide reductase chain C (EC 1.8.5.3), anchor subunit	1006754	1007617	+				0.889324										0.910261									0.795606									0.858417
	fig|588858.6.peg.1730	1811	STM1499	dms2A(2)	psr3A(2)	Anaerobic selenate reductase, molybdenum cofactor-containing periplasmic protein	1586930	1589368	-						0.871128										0.770848									0.862137									0.84331
	fig|588858.6.peg.1729	1809	STM1498	dms2A	psr3A	Homolog of anaerobic selenate reductase	1584396	1586831	-							0.90219
	fig|588858.6.peg.1728	1808	STM1497	dms2B	psr3B	Anaerobic dimethyl sulfoxide reductase chain B (EC 1.8.5.3), iron-sulfur binding subunit	1583768	1584385	-																	0.91739
	fig|588858.6.peg.1727	1807	STM1496	dms2C	psr3C	Anaerobic selenate reductase protein YnfH	1582909	1583766	-									0.750984									0.757956									0.695208									0.741024
	fig|588858.6.peg.1726	1806	STM1495	dms2D	psr3D	Anaerobic dimethyl sulfoxide reductase chaperone DmsD	1582252	1582866	-										0.771125									0.78008									0.65869									0.697495
	fig|588858.6.peg.2877	3103	STM2530	dms3A	psr1C	Anaerobic dimethyl sulfoxide reductase chain A (EC 1.8.5.3), molybdopterin-binding domain	2714465	2716843	-																																							0.897102
	fig|588858.6.peg.2876	3102	STM2529	dms3B	psr1C	Anaerobic dimethyl sulfoxide reductase chain B (EC 1.8.5.3), iron-sulfur binding subunit	2713839	2714468	-																																								0.92336
	fig|588858.6.peg.2875	3101	STM2528	dms3C	psr1C	Anaerobic dimethyl sulfoxide reductase chain C (EC 1.8.5.3), anchor subunit	2713037	2713846	-
	fig|588858.6.peg.4684	5178	STM4305	dms4A	psr2A	Anaerobic dimethyl sulfoxide reductase chain A (EC 1.8.5.3), molybdopterin-binding domain	4565422	4567851	+
	fig|588858.6.peg.4685	5179	STM4306	dms4B	psr2B	Anaerobic dimethyl sulfoxide reductase chain B (EC 1.8.5.3), iron-sulfur binding subunit	4567865	4568491	+
	fig|588858.6.peg.4686	5180	STM4307	dms4C	psr2C	Anaerobic dimethyl sulfoxide reductase chain C (EC 1.8.5.3), anchor subunit	4568484	4569257	+
	fig|588858.6.peg.4687	5181	STM4308	dms4D	psr2D	Anaerobic respiratory reductase chaperone	4569333	4569926	+
			STM4309
	fig|588858.6.peg.772	708		ahpF		Alkyl hydroperoxide reductase protein F	671948	673513	+
	fig|588858.6.peg.773	709				Anaerobic respiratory reductase chaperone	673845	674405	+
	fig|588858.6.peg.774	710				Putative oxidoreductase STM0611-0613, chain A	674629	676677	+
	fig|588858.6.peg.775	711				Putative oxidoreductase STM0611-0613, chain B	676674	677033	+
	fig|588858.6.peg.776	712				Putative oxidoreductase STM0611-0613, chain C	677033	677800	+
	fig|588858.6.peg.777	713		ybdQ		Universal stress protein G	677868	678296	-
										Gene number	ECOLIN_04640	ECOLIN_04645	ECOLIN_04650		ECOLIN_08565	ECOLIN_08570	ECOLIN_08575	ECOLIN_08580	ECOLIN_08585		fig|546.462.peg.986	CUC51_05025	CUC51_05030		fig|546.462.peg.1638	CUC51_08205	CUC51_08200	CUC51_08195		KP1_1895	KP1_1897	KP1_1898		KP1_2603	KP1_2602	KP1_2601	KP1_2600		M8246_21475	M8246_21470	M8246_21465		M8246_18490	M8246_18495	M8246_18500	M8246_18505		M8246_12025	M8246_12030
										Bidirectional or unidirectional hit	bi	bi	bi		bi	bi	uni	bi	bi		bi	bi	bi		bi	uni	bi	bi		bi	uni	bi		bi	bi	bi	bi		bi	bi	bi		bi	uni	bi	bi		bi	bi
										STM14_#	1089	1090	1091		1811	1809	1090	1807	1806		1089	1090	1091		1811	1808	1807	1806		1089	1090	1091		1811	1090	1807	1806		1089	1090	1091		1811	1090	1807	1806		3103	3102
										Gene	dms1A	dms1B	dms1C		dms2A(2)	dms2A	dms1B	dms2C	dmsD		dms1A	dms1B	dms1C		dms2A(2)	dms2B	dms2C	dmsD		dms1A	dms1B	dms1C		dms2A(2)	dms1B	dms2C	dmsD		dms1A	dms1B	dms1C		dms2A(2)	dms1B	dms2C	dmsD		dms3A	dms3B
										ID x Coverage	0.92907	0.966145	0.889324		0.871128	0.90219	0.922365	0.750984	0.771125		0.788131	0.92734	0.910261		0.770848	0.91739	0.757956	0.78008		0.911174	0.90744	0.795606		0.862137	0.90744	0.695208	0.65869		0.91816	0.97112	0.858417		0.84331	0.96117	0.741024	0.697495		0.897102	0.92336
										Syntenic?	syn	syn	syn		syn	syn		syn	syn		syn	syn	syn		syn		syn	syn		syn	syn	syn		syn		syn	syn		syn	syn	syn		syn		syn	syn		syn	syn
										Strain					E. coli Nissle 1917									Citrobacter freundii									Klebsiella pneumoniae											Enterobacter cloacae RS35
																							UMH19										NTUH-K2044
[truncated: 54 more columns]
